# Supplementary material for: Human Cytomegalovirus Tegument Protein pUL71 Is Required for Efficient Virion Egress
Source: PubMed Central journal article supplement — mBio. 2010 Nov 30;1(5):e00282-10. doi: 10.1128/mBio.00282-10 (PMC2999941; doi:10.1128/mbio.00282-10), 2010-11-30
Supplement: mBio00282-10-st1.pdf [file mBio00282-10-st1.pdf]

Table S1. Oligonucleotide Primers Used in This Study

| Name                 | Sequence (5'-3')                                                                                                          | Application |
|----------------------|---------------------------------------------------------------------------------------------------------------------------|-------------|
| UL71STOPgalK_forward | CGT CGC GCC GGC ACG ATG CAG CTG GCC CAG CGC CTG TGC<br>GAG CTG CTG ATG CCT GTT GAC AAT TAA TCA TCG GCA                    | Cloning     |
| UL71STOPgalK_reverse | GCT AGG CTG CAG CAG CAC GTA ATC GGC CAC AGG CGC<br>GGC TTT GCG ACG GCA TCA GCA CTG TCC TGC TCC TT                         | Cloning     |
| UL71seq_forward      | GTA GCG CGA GAG CTG CAG CGT                                                                                               | Sequencing  |
| UL71seq_reverse      | AGG CAA ACA GCC CTC CGA GAG                                                                                               | Sequencing  |
| UL71STOP_forward     | ACG ATG CAG CTG GCC CAG CGC CTG TGC GAG CTG CTG ATG TAA ATA<br>AAT AAT GCC GTC GCA AAG CCG CGC CTG TGG CCG ATT ACG TGC TG | Cloning     |
| UL71STOP_reverse     | CAG CAC GTA ATC GGC CAC AGG CGC GGC TTT GCG ACG GCA TTA TTT<br>ATT TAC ATC AGC AGC TCG CAC AGG CGC TGG GCC AGC TGC ATC GT | Cloning     |
| UL71GFP_forward      | AGG GGC GTG AAG AAA AAG AAA CCC ACG GCG GCG GCC<br>TTG CTG TCC TCC GCG GCC GGA AGA AGA TGG AAA AAG                        | Cloning     |
| UL71GFP_reverse      | GTA CTC GTC GTG TCC GTG ATC ACG TAC GTT TTC CAA<br>AAC GTG CCA GGC TGT CGT CGT GGA ATG CCT TCG                            | Cloning     |
| UL71GFPseq_forward1  | ACG GAT CAG GCC TCG CTG GT                                                                                                | Sequencing  |
| UL71GFPseq_forward2  | ATG GTC ACC ATA CCT CCT CC                                                                                                | Sequencing  |
| UL71GFPseq_forward3  | GGC ACA AGC TGG AGT ACA AC                                                                                                | Sequencing  |
| UL71GFPseq_reverse   | ACA CGG CGG CAA CCG TTT CC                                                                                                | Sequencing  |
| qUL70_forward        | TAC ACG CGA CAC GAA GTC TTC                                                                                               | qPCR        |
| qUL70_reverse        | AGT CCG CGA CAT AGC TCA AAG                                                                                               | qPCR        |
| qUL72_forward        | GGA ACT TTG AGC GGT GAC GG                                                                                                | qPCR        |
| qUL72_reverse        | GCG TTA CTG CGT GCG TTT CG                                                                                                | qPCR        |
| qActin_forward       | TCC TCC TGA GCG CAA GTA CTC                                                                                               | qPCR        |
| qActin_reverse       | CGG ACT CGT CAT ACT CCT GCT T                                                                                             | qPCR        |
| FIXactin_forward     | GAA CGT GGC GGG TCG CAG CTT CAG ATG GTA GGC CAC<br>CCG CTC CGA GAG TTG TCC TCC TGA GCG CAA GTA CTC                        | Cloning     |
| FIXactin_reverse     | GAA AGC GCT TTT GGG ATC ACC CAC CTG CAG TCC TGT TGC<br>CTG AAC GAG CAT CGG ACT CGT CAT ACT CCT GCT T                      | Cloning     |
| qUL123_forward       | GCC TTC CCT AAG ACC ACC AAT                                                                                               | qPCR        |
| qUL123_reverse       | ATT TTC TGG GCA TAA GCC ATA ATC                                                                                           | qPCR        |
