# Supplementary material for: Human Cytomegalovirus Tegument Protein pUL71 Is Required for Efficient Virion Egress
Source: PubMed Central journal article supplement — mBio. 2010 Nov 30;1(5):e00282-10. doi: 10.1128/mBio.00282-10 (PMC2999941; doi:10.1128/mbio.00282-10), 2010-11-30
Supplement: mBio00282-10-st2.pdf [file mBio00282-10-st2.pdf]

Table S2. Primary Antibodies Used in This Study

| Antigen       | Host   | Application (Dilution) | [Citation] or Manufacturer   | [Clone] or Catalog Number |
|---------------|--------|------------------------|------------------------------|---------------------------|
| pUL123 (IE1)  | Mouse  | WB (1:100) IFA (1:10)  | [1]                          | [1B12]                    |
| pUL44 (ICP36) | Mouse  | WB (1:2500)            | Virusys                      | CA0006-100                |
| pUL99 (pp28)  | Mouse  | WB (1:100) IFA (1:10)  | [2]                          | [10B4-29]                 |
| a-Tubulin     | Mouse  | WB (1:5000)            | Sigma-Aldrich                | T6199-200UL               |
| GFP           | Mouse  | WB (1:1000)            | Roche                        | 11 814 460 001            |
| pUL55 (gB)    | Goat   | IFA (1:100)            | Abcam                        | ab20507-1                 |
| GRP94 (H-212) | Rabbit | IFA (1:100)            | Santa Cruz Biotechnology     | sc-11402                  |
| ERGIC53       | Mouse  | IFA (1:1000)           | Enzo Life Sciences           | ALX-804-602-C100          |
| GM130         | Rabbit | IFA (1:100)            | Abcam                        | ab40881                   |
| p230          | Mouse  | IFA (1:100)            | BD Transduction Laboratories | 611280                    |
| EEA1          | Rabbit | IFA (1:100)            | Cell Signaling Technologies  | 2411                      |
| CD63          | Mouse  | IFA (1:100)            | Fitzgerald                   | 10R-CD63AHU               |
| LAMP1 (H-228) | Rabbit | IFA (1:100)            | Santa Cruz Biotechnology     | sc-5570                   |
| LAMP1 (H4A3)  | Mouse  | IFA (1:100)            | Abcam                        | ab25630                   |
| pUL83 (pp65)  | Mouse  | WB (1:100)             | [3]                          | [8F5]                     |
| pUL55 (gB)    | Mouse  | WB (1:100)             | Goodwin Institute            |                           |
| pUL85 (mCP)   | Mouse  | WB (1:500)             | gift from W. Gibson          | [85-13]                   |
